# Supplementary material for: Ultrasound-assisted nucleation and growth of hydroxyl-protected and ligand-free Cs3Cu2X5 nanocrystals with bright luminescence
Source: Royal Society of Chemistry journal article supplement (doi:10.1039/d4cp02172j), 2024-01-01
Supplement: d4cp02172j2.pdf [file d4cp02172j2.pdf]

## 2. Supplementary figures

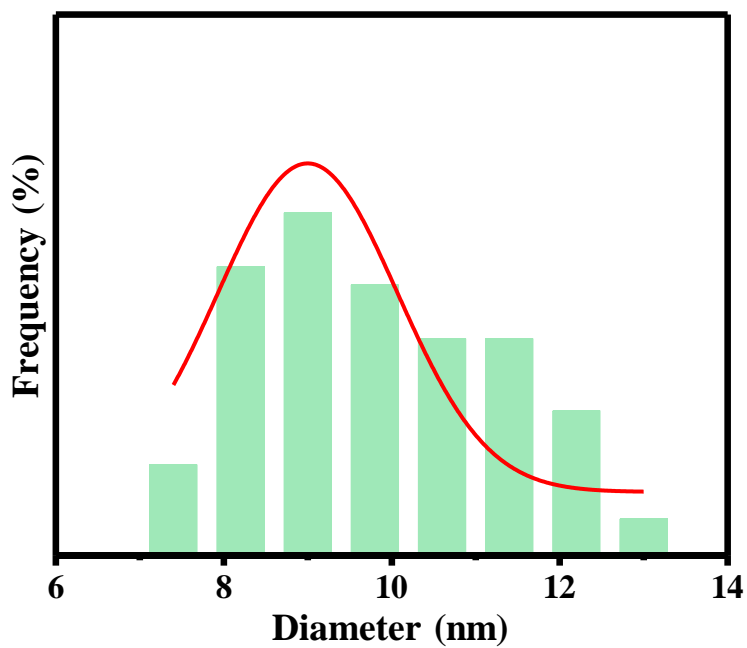

**Fig. S1** The particle size distribution map of Cs<sub>3</sub>Cu<sub>2</sub>I<sub>5</sub> NCs in TEM image.

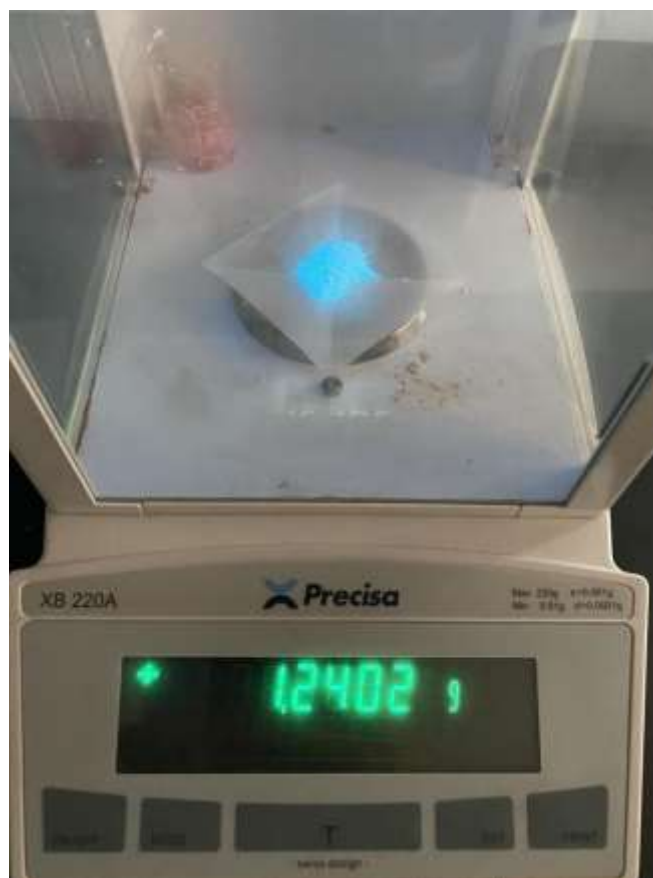

**Fig. S2 Gram-scale  $\text{Cs}_3\text{Cu}_2\text{I}_5$  NCs under 254 nm UV light.**

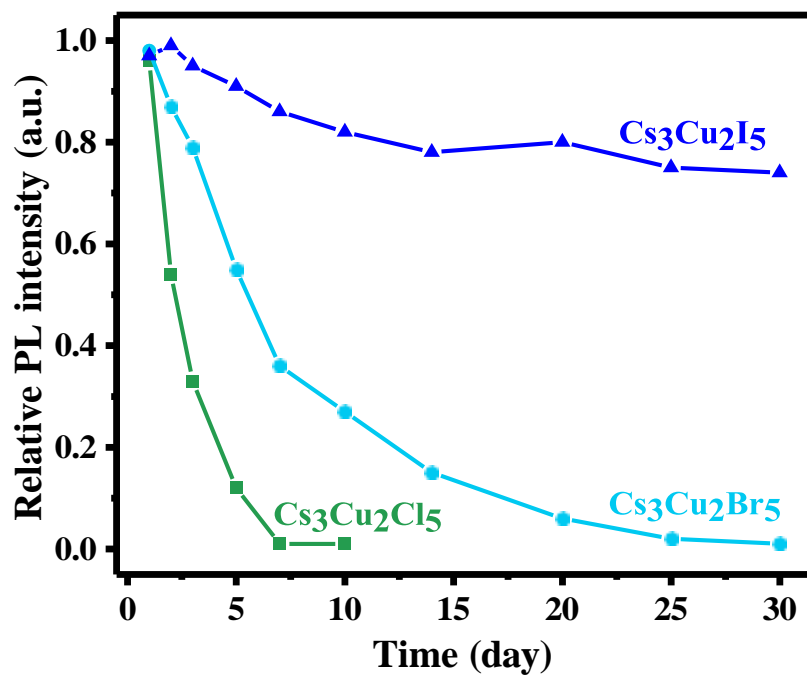

Fig. S3 PL stability evolutions of the NCs with different halide compositions in the ambient atmosphere.

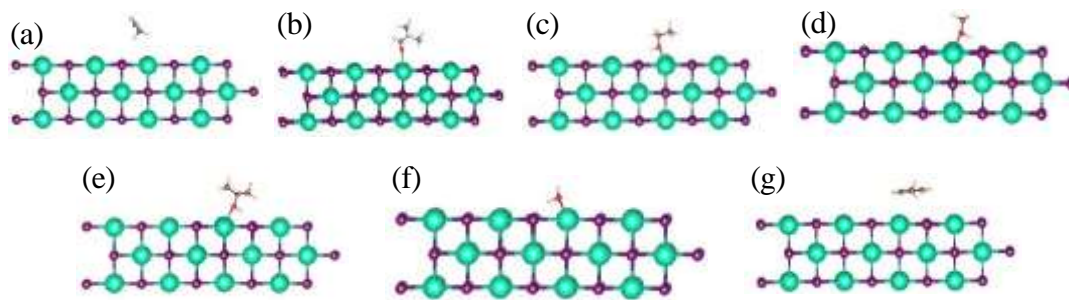

**Fig. S4 Schematic illustration of the solvent adsorption process with CsI (a: ACN, b: DMF, c: EtOH, d: MeOH, e: IPA, f: H<sub>2</sub>O, g: TOL).**

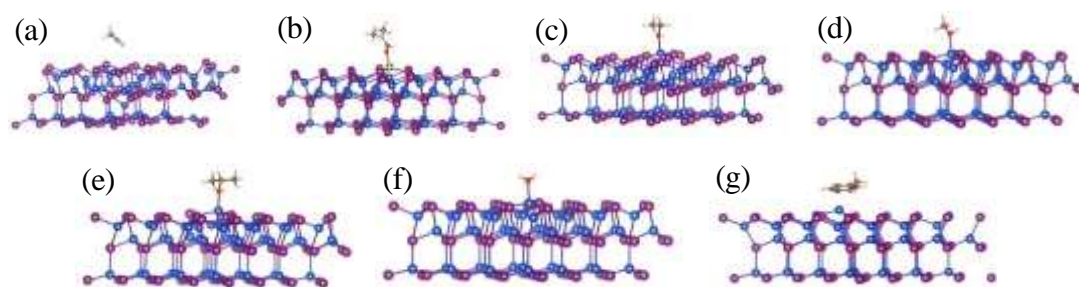

**Fig. S5 Schematic illustration of the solvent adsorption process with CuI (a: ACN, b: DMF, c: EtOH, d: MeOH, e: IPA, f: H<sub>2</sub>O, g: TOL).**

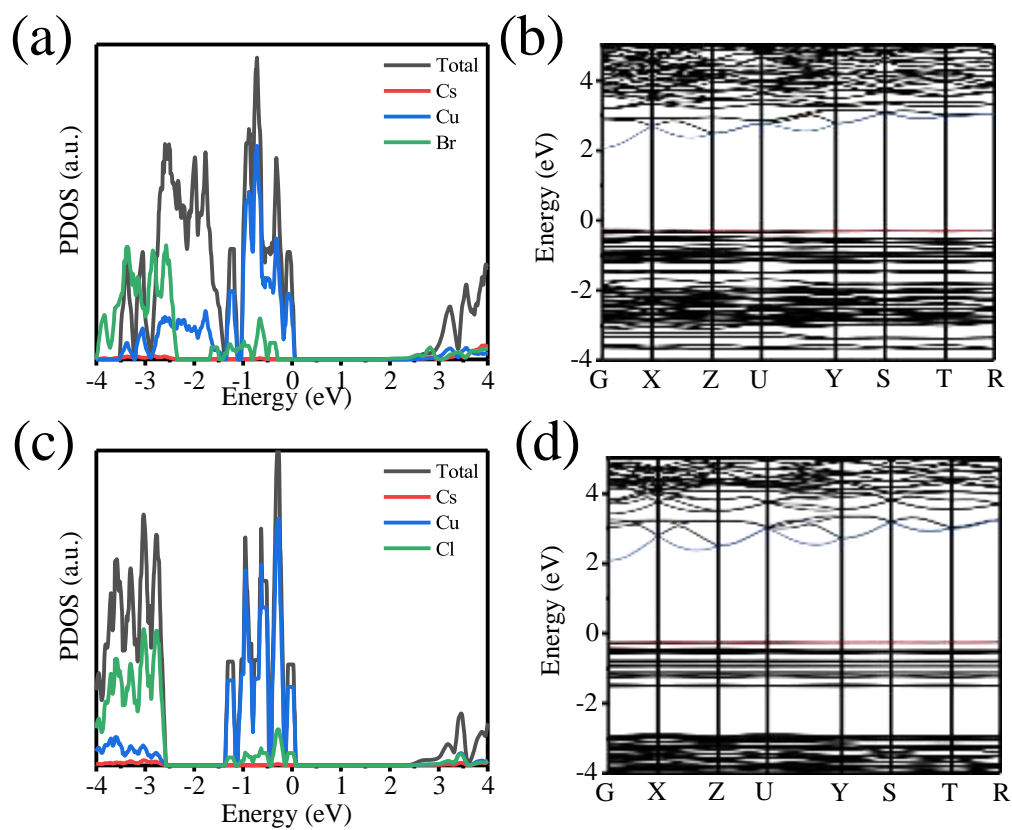

**Fig. S6** The calculated density of states (a and c) and band structures (b and d) of  $\text{Cs}_3\text{Cu}_2\text{Br}_5$  (a and b) and  $\text{Cs}_3\text{Cu}_2\text{Cl}_5$  (c and d).

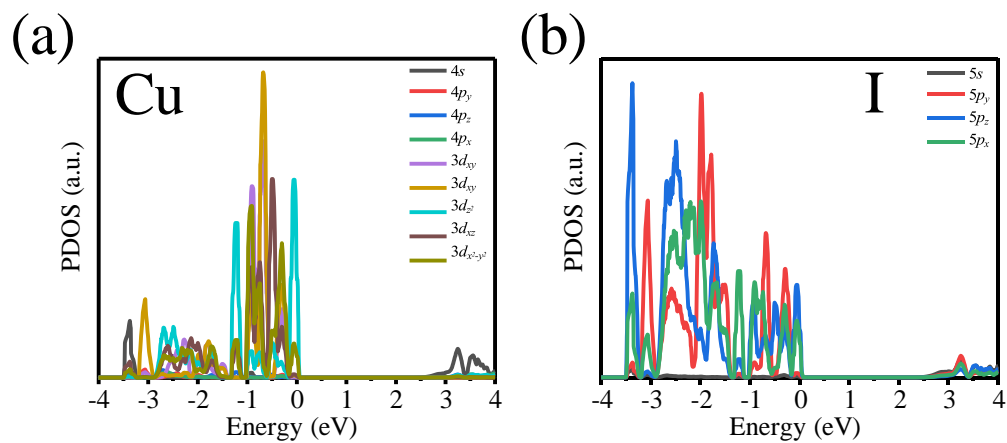

**Fig. S7** Density of states of for Cu and I.

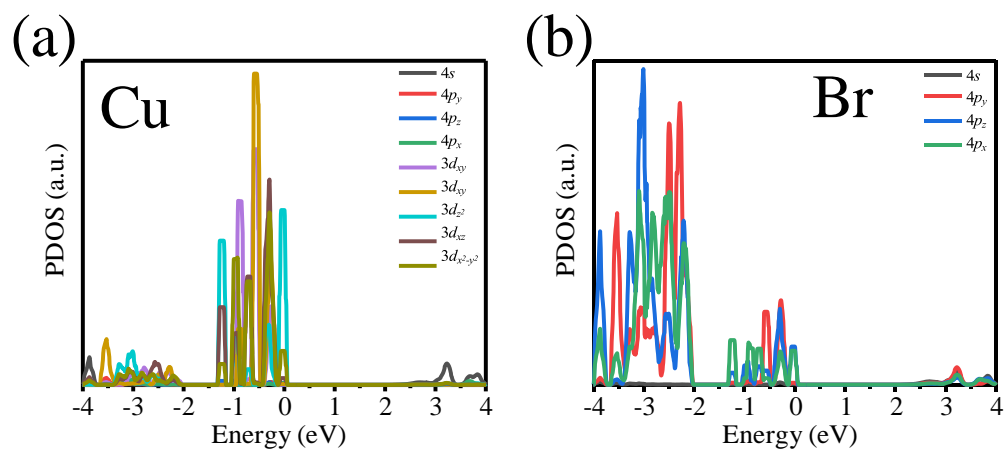

**Fig. S8 Density of states of for Cu and Br.**



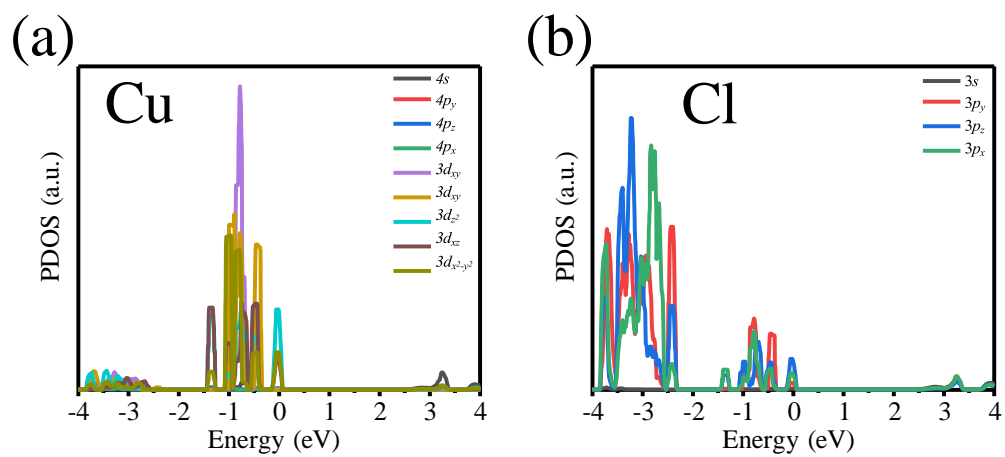

**Fig. S9** Density of states of for Cu and Cl.

**Table S1. The binding energies between the solvent and precursors.**

| <b>Compounds</b>          | <b>Binding Energy(eV)</b> |
|---------------------------|---------------------------|
| <b>CsI-ACN</b>            | -0.026                    |
| <b>CsI-DMF</b>            | -1.353                    |
| <b>CsI-EtOH</b>           | -0.469                    |
| <b>CsI-MeOH</b>           | -0.490                    |
| <b>CsI-IPA</b>            | -0.495                    |
| <b>CsI-H<sub>2</sub>O</b> | -0.488                    |
| <b>CsI-TOL</b>            | -0.083                    |
| <b>CuI-ACN</b>            | -0.098                    |
| <b>CuI-DMF</b>            | -0.201                    |
| <b>CuI-EtOH</b>           | 0.002                     |
| <b>CuI-MeOH</b>           | -0.018                    |
| <b>CuI-IPA</b>            | -0.136                    |
| <b>CuI-H<sub>2</sub>O</b> | 0.019                     |
| <b>CuI-TOL</b>            | 0.152                     |

## Reference

- [1] Kresse, G.; Hafner, J. Ab-Initio Molecular-Dynamics for Open-Shell Transition-Metals. *Phys. Rev.* **1993**, *48*, 13115-13118.
- [2] Kresse, G.; Furthmüller, J. Efficiency of Ab-initio Total Energy Calculations for Metals and Semiconductors Using a Plane-wave Basis Set. *Comput. Mater. Sci.* **1996**, *6*, 15-50.
- [3] Kresse, G.; Furthmüller, J. Efficient Iterative Schemes for Ab Initio Total-Energy Calculations Using a Plane-Wave Basis Set. *Phys. Rev. B* **1996**, *54*, 11169-11186.
- [4] Blöchl PE, Projector Augmented-wave Method. *Phys. Rev. B* **1994**, *50*, 17953-17979.
- [5] Perdew JP, Burke K, Ernzerhof M, Generalized Gradient Approximation Made Simple. *Phys. Rev. Lett.* **1996**, *77*, 3865-3868.
